# Supplementary material
Source: Springer Nature journal article supplement (https://www.springermedizin.de/resource/supplementary/12872_2010_328_MOESM2_ESM.pdf/9429710)

**A**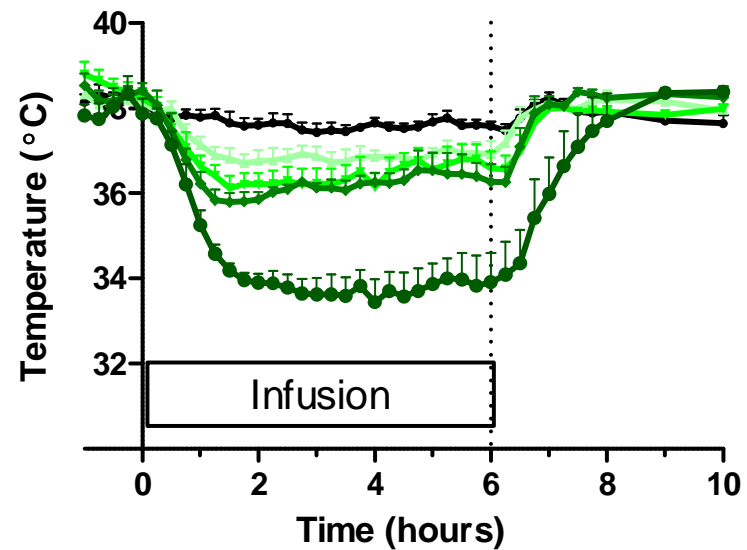

- Control
- DHC (0.125 mg/kg/h)
- DHC (0.25 mg/kg/h)
- DHC (0.50 mg/kg/h)
- DHC (0.75 mg/kg/h)

**B**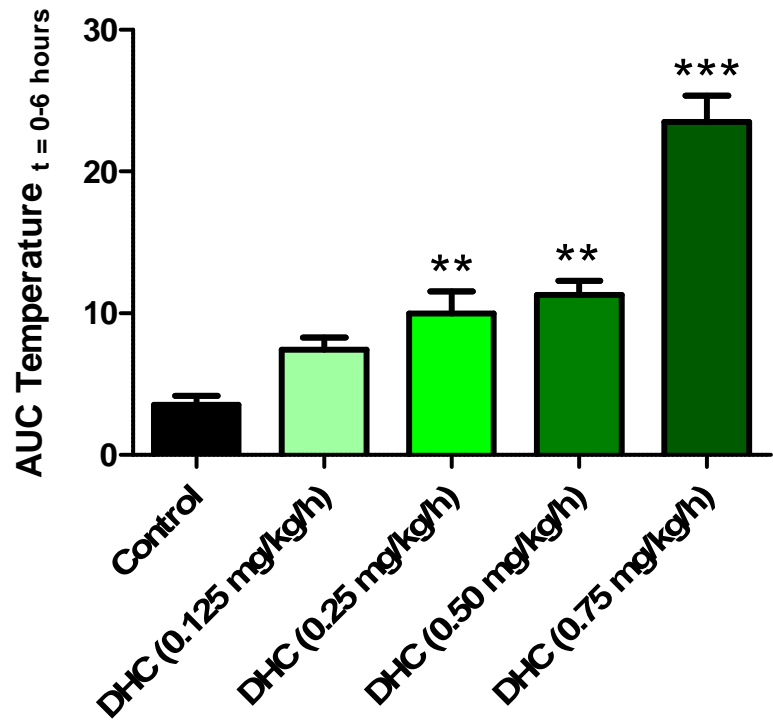

Supplement: MOESM2 [file 9429710]
